# Supplementary material for: Association of Cataract Surgery With Risk of Diabetic Retinopathy Among Asian Participants in the Singapore Epidemiology of Eye Diseases Study
Source: PubMed Central journal article supplement (PMC7298610; doi:10.1001/jamanetworkopen.2020.8035), 2020-06-16
Supplement: jamanetwopen-3-e208035-s001.pdf [file jamanetwopen-3-e208035-s001.pdf]

## Supplementary Online Content

Tham Y-C, Liu L, Rim TH, et al. Association of cataract surgery with risk of diabetic retinopathy among Asian participants in the Singapore Epidemiology of Eye Diseases Study. *JAMA Netw Open*. 2020;3(6):e208035. doi:10.1001/jamanetworkopen.2020.8035

**eTable 1.** Baseline Characteristics of Included and Excluded Participants

**eTable 2.** Stratified Tabulation of Incident DR Cases, by Baseline Cataract Surgery Status and DR Severity

**eTable 3.** Multivariable Regression Model (Model 2 in Main Table 2) Showing the Associations Between Baseline Factors and DR Incidence

**eTable 4.** Multivariable Regression Model (Model 2 in Main Table 3) Showing the Associations Between Baseline Factors and DR Incidence

**eTable 5.** Multivariable Regression Model (Model 2 in Main Table 4) Showing the Associations Between Baseline Factors and DR Incidence

This supplementary material has been provided by the authors to give readers additional information about their work.

**eTable 1.** Baseline Characteristics of Included and Excluded Participants

|                                                                                                                                                                                                                         | <b>Excluded (N=520)</b> | <b>Included (N=972)</b> | <b>P Value*</b> |
|-------------------------------------------------------------------------------------------------------------------------------------------------------------------------------------------------------------------------|-------------------------|-------------------------|-----------------|
| Age, years                                                                                                                                                                                                              | 60.4 (10.1)             | 58.7 (9.1)              | 0.002           |
| Gender (Male), %                                                                                                                                                                                                        | 241 (46.4)              | 495 (50.9)              | 0.103           |
| Ethnicity (Malay),%                                                                                                                                                                                                     | 258 (49.6)              | 392 (40.3)              | 0.001           |
| Current smoking, %                                                                                                                                                                                                      | 81 (15.6)               | 131 (13.5)              | 0.247           |
| Diabetes duration, years                                                                                                                                                                                                | 4.3 (7.2)               | 5.5 (6.8)               | 0.002           |
| Anti-diabetic medication use, %                                                                                                                                                                                         | 227 (43.7)              | 582 (59.9)              | <0.001          |
| Hypertension, %                                                                                                                                                                                                         | 403 (77.5)              | 721 (74.2)              | 0.175           |
| Systolic blood pressure, mmHg                                                                                                                                                                                           | 147.6 (23.7)            | 141.7 (19.8)            | <0.001          |
| Diastolic blood pressure, mmHg                                                                                                                                                                                          | 80.1 (11.0)             | 78.7 (10.0)             | 0.023           |
| HbA <sub>1c</sub> , %                                                                                                                                                                                                   | 7.5 (1.6)               | 7.7 (1.6)               | 0.025           |
| Body mass index, kg/m <sup>2</sup>                                                                                                                                                                                      | 27.5 (5.0)              | 27.7 (4.8)              | 0.503           |
| Random blood glucose, mg/dL                                                                                                                                                                                             | 160.2 (77.4)            | 172.8 (77.4)            | 0.002           |
| Positive cataract surgery status at baseline**, %                                                                                                                                                                       | 78 (8.0)                | 163 (9.4)               | 0.247           |
| Data presented as mean (standard deviation) or frequency (percentage), where appropriate.<br><br>*P value was estimated based on chi-square or independent t-test, where appropriate.<br><br>**Based on eye-level data. |                         |                         |                 |

| <b>eTable 2.</b> Stratified Tabulation of Incident DR Cases, by Baseline Cataract Surgery Status and DR Severity   |                                        |                                                                               |                      |                             |                        |                 |
|--------------------------------------------------------------------------------------------------------------------|----------------------------------------|-------------------------------------------------------------------------------|----------------------|-----------------------------|------------------------|-----------------|
|                                                                                                                    |                                        | <b>Incident DR cases stratified by DR severity level*, number of eyes (%)</b> |                      |                             |                        |                 |
| <b><u>Eyes which had cataract surgery and developed DR</u></b>                                                     | <b>Number of eyes with incident DR</b> | Minimal NPDR (Level 15-20)                                                    | Mild NPDR (Level 35) | Moderate NPDR (Level 43-47) | Severe NPDR (Level 53) | PDR (>Level 60) |
| Positive cataract surgery status at baseline                                                                       | 31                                     | 17 (54.8%)                                                                    | 11 (35.5%)           | 2 (6.5%)                    | 0 (0.0%)               | 1 (3.2%)        |
| Positive cataract surgery status during 6-year follow-up                                                           | 46                                     | 16 (34.8%)                                                                    | 14 (30.4%)           | 10 (21.7%)                  | 2 (4.4%)               | 4 (8.7%)        |
| <b>Overall</b>                                                                                                     | <b>77</b>                              | <b>33 (42.8%)</b>                                                             | <b>25 (32.5%)</b>    | <b>12 (15.6%)</b>           | <b>2 (2.6%)</b>        | <b>5 (6.5%)</b> |
| * According to the modified Airlie House classification system.                                                    |                                        |                                                                               |                      |                             |                        |                 |
| DR =diabetic retinopathy; NPDR = non-proliferative diabetic retinopathy; PDR = proliferative diabetic retinopathy. |                                        |                                                                               |                      |                             |                        |                 |

**eTable 3.** Multivariable Regression Model (Model 2 in Main Table 2) Showing the Associations Between Baseline Factors and DR Incidence

| <b>Baseline Factors</b>            | <b>RR (95%CI)</b> | <b>P Value</b> |
|------------------------------------|-------------------|----------------|
| Age, year                          | 0.96 (0.94-0.97)  | <0.001         |
| Gender (Male)                      | 1.12 (0.76-1.65)  | 0.563          |
| Ethnicity (Malay)                  | 1.05 (0.78-1.43)  | 0.734          |
| HbA <sub>1c</sub> , %              | 1.32 (1.20-1.46)  | <0.001         |
| Diabetes duration, year            | 1.02 (0.99-1.04)  | 0.288          |
| Random blood glucose, mmol/L       | 1.01 (0.97-1.05)  | 0.484          |
| Anti-diabetes medication use       | 1.40 (1.00-1.95)  | 0.048          |
| Hypertension status                | 1.31 (0.95-1.80)  | 0.100          |
| Body mass index, kg/m <sup>2</sup> | 0.96 (0.92-0.99)  | 0.010          |
| Current smoking                    | 1.08 (0.68-1.71)  | 0.743          |
| Baseline cataract surgery          | 2.07 (1.34-3.20)  | 0.001          |

RR = relative risk; CI = confidence interval; DR = diabetic retinopathy.

**eTable 4.** Multivariable Regression Model (Model 2 in Main Table 3) Showing the Associations Between Baseline Factors and Incidence of DR

| <b>Baseline Factors</b>                              | <b>RR (95%CI)</b> | <b>P Value</b> |
|------------------------------------------------------|-------------------|----------------|
| Age, year                                            | 0.97 (0.95-0.99)  | 0.001          |
| Gender (Male)                                        | 1.08 (0.74-1.58)  | 0.691          |
| Ethnicity (Malay)                                    | 1.21 (0.88-1.65)  | 0.238          |
| HbA <sub>1c</sub> , %                                | 1.40 (1.27-1.54)  | <0.001         |
| Diabetes duration, year                              | 1.04 (1.01-1.06)  | 0.002          |
| Random blood glucose, mmol/L                         | 0.99 (0.95-1.03)  | 0.684          |
| Anti-diabetes medication use                         | 1.20 (0.87-1.65)  | 0.262          |
| Hypertension status                                  | 1.11 (0.82-1.50)  | 0.518          |
| Body mass index, kg/m <sup>2</sup>                   | 0.97 (0.93-1.00)  | 0.033          |
| Current smoking                                      | 1.11 (0.71-1.75)  | 0.636          |
| Cataract surgery (performed during follow-up period) | 1.64 (1.15-2.33)  | 0.006          |

RR = relative risk; CI = confidence interval; DR = diabetic retinopathy.

**eTable 5.** Multivariable Regression Model (Model 2 in Main Table 4) Showing the Associations Between Baseline Factors and Incidence of DR.

| <b>Baseline Factors</b>            | <b>RR (95%CI)</b> | <b>P Value</b> |
|------------------------------------|-------------------|----------------|
| Age, year                          | 0.97 (0.95-0.99)  | 0.001          |
| Gender (Male)                      | 1.07 (0.74-1.54)  | 0.716          |
| Ethnicity (Malay)                  | 1.17 (0.87-1.57)  | 0.289          |
| HbA <sub>1c</sub> , %              | 1.35 (1.23-1.48)  | <0.001         |
| Diabetes duration, year            | 1.02 (1.00-1.05)  | 0.031          |
| Random blood glucose, mmol/L       | 1.00 (0.96-1.04)  | 0.893          |
| Anti-diabetes medication use       | 1.26 (0.93-1.70)  | 0.135          |
| Hypertension status                | 1.18 (0.88-1.58)  | 0.269          |
| Body mass index, kg/m <sup>2</sup> | 0.96 (0.93-0.99)  | 0.010          |
| Current smoking                    | 1.22 (0.81-1.85)  | 0.343          |
| Any prior cataract surgery         | 1.70 (1.26-2.30)  | 0.001          |

RR = relative risk; CI = confidence interval; DR = diabetic retinopathy.
